# Supplementary material for: Nucleocytoplasmic transport in the midzone membrane domain controls yeast mitotic spindle disassembly
Source: PubMed Central journal article supplement — J Cell Biol. 2015 May 11;209(3):387–402. doi: 10.1083/jcb.201412144 (PMC4427787; doi:10.1083/jcb.201412144), 2015-05-11
Supplement: supp_jcb.201412144_JCB_201412144_sm.pdf [file supp_jcb.201412144_JCB_201412144_sm.pdf]

Lucena et al., <http://www.jcb.org/cgi/content/full/jcb.201412144/DC1>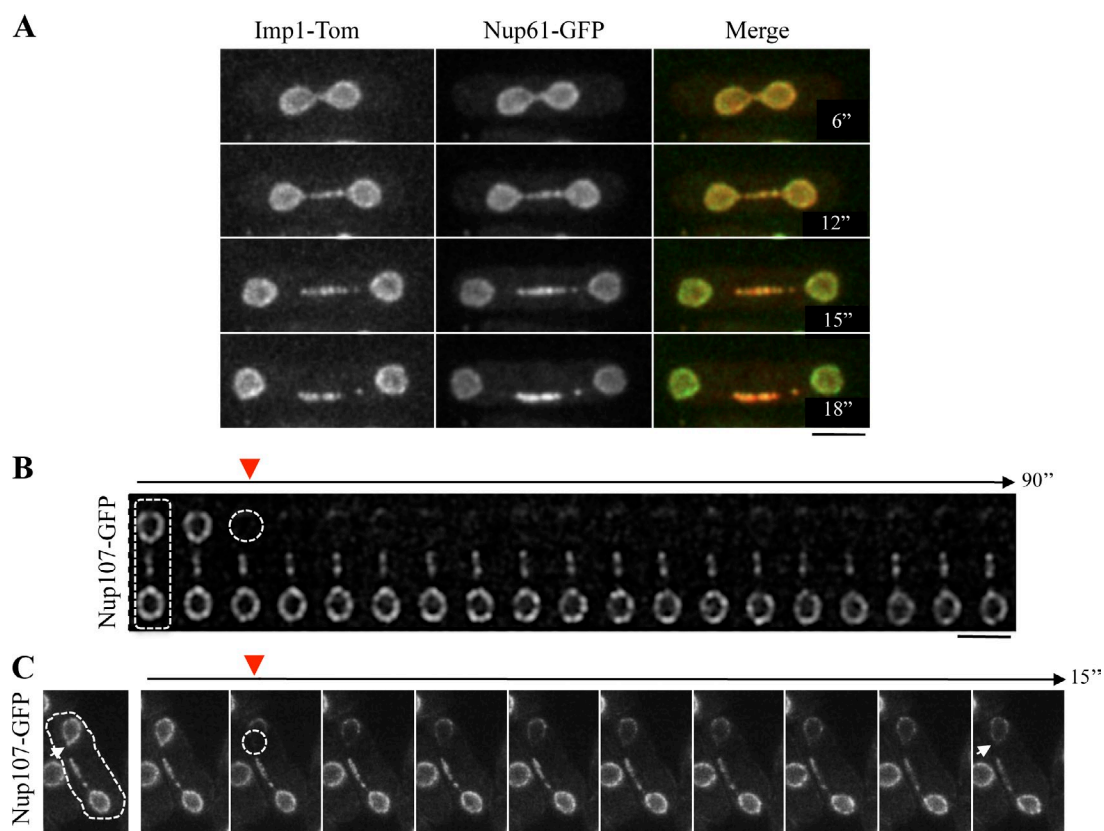

Figure S1. **Imp1-Tom and Nup61-GFP colocalization and Nup107-GFP dynamics in the nuclear envelope of anaphase B cells.** (A) Colocalization of Imp1-Tom and the nuclear pore marker Nup61-GFP by time-lapse fluorescence microscopy. (B) Time-lapse images of a representative Nup107-GFP-expressing cell (dashed line). Red arrowhead indicates image acquired immediately after photobleaching one entire nucleus. (C) As in B but photobleaching the half nuclear region flanking the internuclear bridge. White arrows indicate a possible barrier that restricts free diffusion of nuclear pores from the nuclear membrane to the bridge membrane before and after photobleaching. Bars, 5  $\mu$ m.

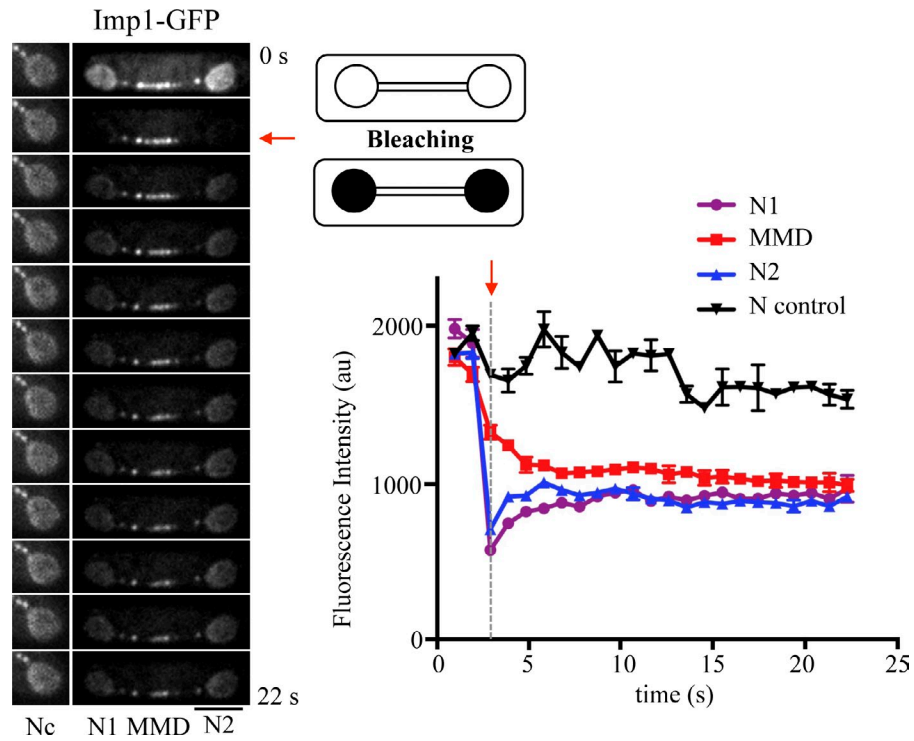

Figure S2. **Time-lapse fluorescence images of Imp1-GFP-expressing cells.** Red arrow indicates image acquired immediately after photobleaching Imp1-GFP in the two nuclei (see schematized cells on right). (graph) Time course fluorescence intensity (FLIP assay, arbitrary units) in both nuclei and the MMD region (N1, N2 and MMD, respectively). Time immediately after photobleaching is indicated by the red arrow and dashed line. Nonbleached nucleus is used as a control. Bar, 5  $\mu$ m

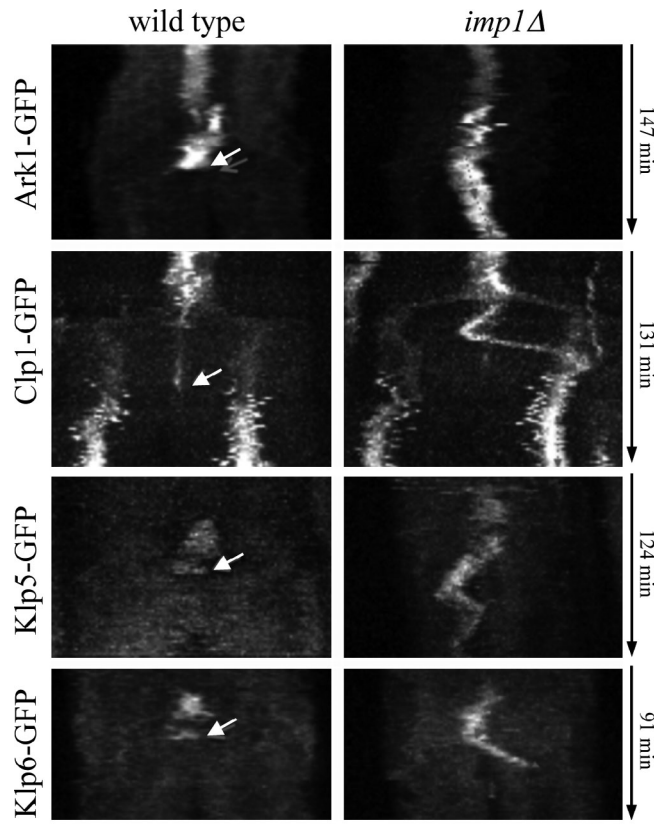

Figure S3. **Kymographs of wild-type and *imp1* $\Delta$  cells expressing Ark1-GFP (Aurora B) kinase, Clp1-GFP phosphatase, and Klp5-GFP and Klp6-GFP kinases.** Arrows indicate spindle disassembly in wild-type cells. Bar, 5  $\mu$ m

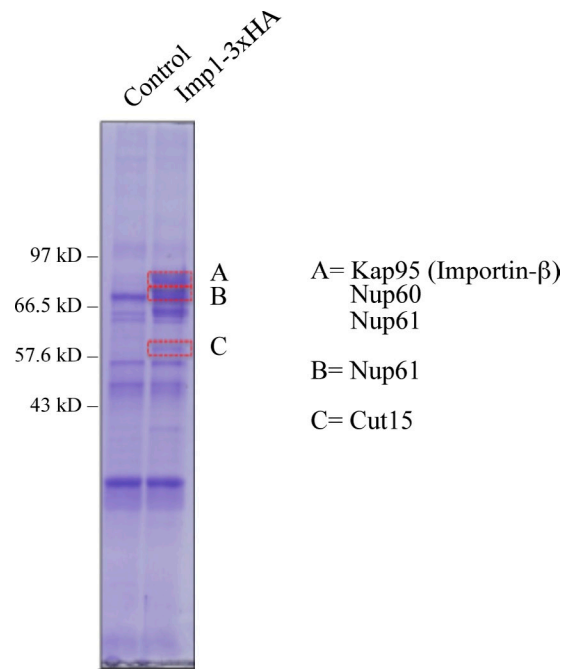

Figure S4. **Imp1-3xHA-associated proteins (Coomassie blue staining) separated by SDS-PAGE.** A, B, and C represent abundant Imp1-3xHA-binding proteins a compared with the control.

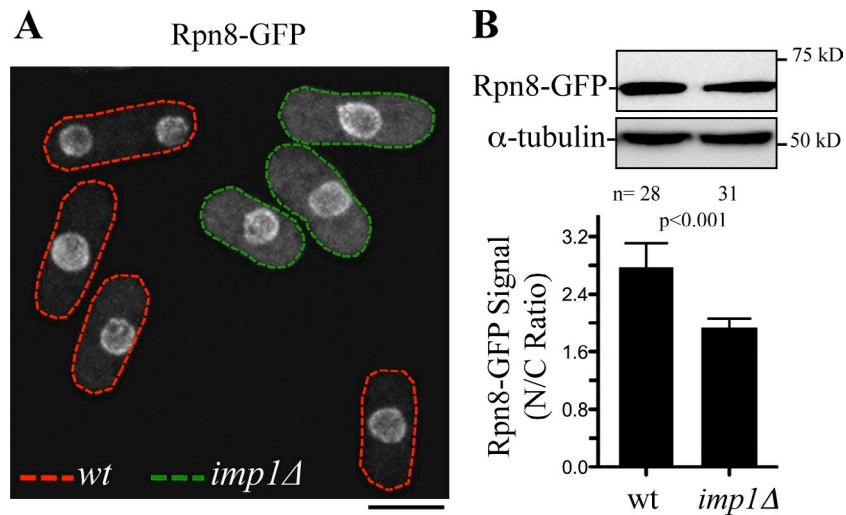

Figure S5. **Influence of Imp1 in the nuclear localization of the Rpn8 proteasome regulatory factor.** (A) Rpn8-GFP localization in asynchronous *rpn8-GFP* (lectin labeled) and *rpn8-GFP imp1Δ* cells (green- and red-dashed cells, respectively) incubated at 25°C. Bar, 5 μm. (B) Ratio of nuclear to cytoplasmic fluorescence intensity in asynchronous *rpn8-GFP* (lectin labeled) and *rpn8-GFP imp1Δ* cells. Western blot analysis of Rpn8-GFP in cell extract of both strains are shown. Tubulin is used as a control. Graph represents mean and standard deviation.

Table S1. Imp1–3xHA binding proteins identified by mass spectrometry

| PomBase accession no. | Gene       | Imp1–3xHA | Control | Protein description                                      |
|-----------------------|------------|-----------|---------|----------------------------------------------------------|
| SPCC18B5.07c          | nup61      | 53        | 6       | <b>Nucleoporin</b>                                       |
| SPCC285.13c           | nup60      | 43        | 2       | <b>Nucleoporin</b>                                       |
| SPAC30D11.04c         | nup124     | 27        | 0       | <b>Nucleoporin</b>                                       |
| SPBC19C7.10           | bqt4       | 11        | 0       | Bouquet formation protein                                |
| SPAC1B1.03c           | kap95      | 10        | 0       | Karyopherin                                              |
| SPBC1604.08c          | imp1       | 9         | 1       | <b>Importin-α</b>                                        |
| SPCC895.05            | for3       | 9         | 1       | Formin                                                   |
| SPCC13B11.01          | adh1       | 8         | 3       | Alcohol dehydrogenase                                    |
| SPAC13G7.02c          | ssa1       | 7         | 3       | Heat shock protein Ssa1 (predicted)                      |
| SPBC1773.09c          | mug184     | 5         | 0       | Hsp70 protein binding protein                            |
| SPAC1071.08           | rpp203     | 5         | 2       | 60S acidic ribosomal protein P2C subunit                 |
| SPCC1840.02c          | bgs4       | 5         | 2       | 1,3-β-glucan synthase subunit Bgs4                       |
| SPBC9B6.08            | clc1       | 5         | 3       | Clathrin light chain                                     |
| SPBC106.06            | cct4       | 4         | 0       | Chaperonin-containing T-complex δ subunit Cct4           |
| SPCC965.05c           | thp1       | 4         | 0       | Uracil DNA N-glycosylase                                 |
| SPCC962.03c           | cut15      | 4         | 0       | <b>Karyopherin</b>                                       |
| SPAC26F1.03           | pda1       | 4         | 0       | Pyruvate dehydrogenase e1 component α subunit            |
| SPAC1F5.02            | pdi1       | 4         | 0       | Protein disulfide isomerase (predicted)                  |
| SPCC1795.11           | sum3       | 4         | 1       | Translation initiation RNA helicase                      |
| SPAC11E3.15           | rpl22      | 4         | 1       | 60S ribosomal protein L22 (predicted)                    |
| SPAC2F3.06c           | kap104     | 3         | 0       | <b>Karyopherin</b>                                       |
| SPBC17D11.05          | tif32      | 3         | 0       | Translation initiation factor eIF3a                      |
| SPCC417.08            | tef3       | 3         | 0       | Translation elongation factor eEF3                       |
| SPBC2G2.08            | ade9       | 3         | 0       | C-1-tetrahydrofolatesynthase (predicted)                 |
| SPBC365.03c           | rpl2101    | 3         | 1       | 60S ribosomal protein L21 (predicted)                    |
| SPBC56F2.02           | rpl1901    | 3         | 1       | 60S ribosomal protein L19                                |
| SPCC825.01            | Unassigned | 3         | 1       | Ribosome biogenesis ATPase, Arb family ABCF1-like        |
| SPBC776.15c           | kgd2       | 3         | 1       | Dihydrolipoamide S-succinyltransferase (predicted)       |
| SPBC646.10c           | Unassigned | 3         | 1       | U3 snoRNP protein Nop56 (predicted)                      |
| SPBC405.05            | atg16      | 3         | 1       | Autophagy protein                                        |
| SPCC794.07            | lat1       | 3         | 1       | Dihydrolipoamide S-acetyltransferase E2 (predicted)      |
| SPBP8B7.06            | rpp201     | 2         | 1       | 60S acidic ribosomal protein A2                          |
| SPBC30D10.13c         | pdb1       | 2         | 0       | Pyruvate dehydrogenase e1 component β subunit            |
| SPCP1E11.09c          | rpp103     | 2         | 0       | 60S acidic ribosomal protein                             |
| SPAC890.08            | rpl31      | 2         | 0       | 60S ribosomal protein L31 (predicted)                    |
| SPAC3H5.12c           | rpl501     | 2         | 0       | 60S ribosomal protein L5 (predicted)                     |
| SPAC589.06c           | Unassigned | 2         | 0       | pho88 family protein (predicted)                         |
| SPBC3B9.13c           | rpp102     | 2         | 0       | 60S acidic ribosomal protein                             |
| SPBC16A3.08c          | oga1       | 2         | 0       | Stm1 homolog                                             |
| SPBC29A3.16           | rrs1       | 2         | 0       | Ribosome biogenesis protein (predicted)                  |
| SPBC215.06c           | Unassigned | 2         | 0       | human LYHRT homolog                                      |
| SPAC17H9.04c          | Unassigned | 2         | 0       | RNA-binding protein                                      |
| SPBC2G5.06c           | hmt2       | 2         | 0       | Sulfide-quinone oxidoreductase                           |
| SPBC4C3.05c           | nuc1       | 2         | 0       | DNA-directed RNA polymerase I complex large subunit      |
| SPAC22G7.05           | kri1       | 2         | 0       | Ribosome biogenesis protein Kri1 (predicted)             |
| SPBP4H10.15           | Unassigned | 2         | 0       | Aconitate hydratase                                      |
| SPBC13A2.04c          | ptr2       | 2         | 0       | PTR family peptide transmembrane transporter             |
| SPCC1682.16           | rpt4       | 2         | 1       | <b>19S proteasome regulatory subunit (predicted)</b>     |
| SPCC364.06            | nap1       | 2         | 1       | Nucleosome assembly protein Nap1                         |
| SPBC839.04            | rpl803     | 2         | 1       | 60S ribosomal protein L8 (predicted)                     |
| SPCC1183.08c          | rpl101     | 2         | 1       | 60S ribosomal protein L10a                               |
| SPAC1420.03           | rpn501     | 2         | 1       | <b>19S proteasome regulatory subunit</b>                 |
| SPCC1682.10           | rpn8       | 1         | 0       | <b>19S proteasome regulatory subunit (predicted)</b>     |
| SPAC589.10c           | Unassigned | 1         | 0       | Ribosomal-ubiquitin fusion protein Ubi5 (predicted)      |
| SPBC3E7.02c           | hsp16      | 1         | 0       | Heat shock protein                                       |
| SPAC1565.08           | cdc48      | 1         | 0       | <b>AAA family ATPase involved in protein degradation</b> |
| SPBC26H8.08c          | grn1       | 1         | 0       | GTPase Grn1                                              |
| SPBC582.07c           | rpn7       | 1         | 0       | <b>19S proteasome regulatory subunit</b>                 |

Table S1. **Imp1-3xHA binding proteins identified by mass spectrometry** (Continued)

| PomBase accession no. | Gene        | Imp1-3xHA | Control  | Protein description                                  |
|-----------------------|-------------|-----------|----------|------------------------------------------------------|
| <b>SPAC3A11.12c</b>   | <b>rpt5</b> | <b>1</b>  | <b>0</b> | <b>19S proteasome regulatory subunit (predicted)</b> |
| SPAC222.12c           | atp2        | 1         | 0        | F1-ATPase $\beta$ subunit                            |
| SPAC821.05            | Unassigned  | 1         | 0        | Translation initiation factor eIF3h                  |
| SPCC1827.03c          | Unassigned  | 1         | 0        | Acetyl-CoA ligase (predicted)                        |
| SPAC8C9.04            | Unassigned  | 1         | 0        | <i>S. pombe</i> -specific protein                    |
| SPCC18B5.01c          | bfr1        | 1         | 0        | Brefeldin A transmembrane transporter                |
| SPBC428.04            | apq12       | 1         | 0        | Nuclear membrane organization protein (predicted)    |
| SPCP25A2.03           | Unassigned  | 1         | 0        | THO complex subunit (predicted)                      |
| SPAC1D4.14            | tho2        | 1         | 0        | THO complex subunit (predicted)                      |
| SPBC651.01c           | nog1        | 1         | 0        | GTP binding protein (predicted)                      |
| SPAC30D11.03          | ddx27       | 1         | 0        | ATP-dependent RNA helicase (predicted)               |
| SPAC15A10.09c         | pun1        | 1         | 0        | SUR7 family protein (predicted)                      |
| SPAC1F7.02c           | has1        | 1         | 0        | ATP-dependent RNA helicase (predicted)               |
| SPAC12G12.02          | efg1        | 1         | 0        | rRNA processing protein (predicted)                  |
| SPBC216.01c           | psy2        | 1         | 0        | Protein phosphatase PP4 complex subunit              |
| SPBC26H8.05c          | pph3        | 1         | 0        | Serine/threonine protein phosphatase, PP4 subunit    |
| SPBC36.05c            | clr6        | 1         | 0        | Histone deacetylase (class I)                        |
| SPBC19F5.05c          | ppp1        | 1         | 0        | Pescadillo-family BRCT domain protein (predicted)    |
| SPAC2F3.03c           | rpa49       | 1         | 0        | DNA-directed RNA polymerase I complex subunit        |
| SPAC20G4.08           | pdcl        | 1         | 0        | mRNA decapping scaffolding protein                   |
| SPAC1834.03c          | hhf1        | 1         | 0        | Histone H4 h4.1                                      |
| SPAC1805.08           | dlc1        | 1         | 0        | Dynein light chain                                   |
| SPAC12G12.03          | cip2        | 1         | 0        | RNA-binding protein                                  |
| SPBP8B7.20c           | nop2        | 1         | 0        | RNA methyltransferase (predicted)                    |
| SPAC24B11.06c         | sty1        | 1         | 0        | MAP kinase                                           |
| SPBC3D6.02            | but2        | 1         | 0        | But2 family protein                                  |

In bold, proteins involved in nucleocytoplasmic transport and proteasome degradation. The number of non-redundant peptides found within each purification is shown.

Table S2. Genotype and strain code of *S. pombe* strains used in this study

| Strain code | Genotype                                                                            |
|-------------|-------------------------------------------------------------------------------------|
| RD313       | <i>h- ura4-d18 leu1-32 ade6-210</i>                                                 |
| JJ1174      | <i>h- imp1Δ::ura4 leu1-32</i>                                                       |
| JJ1801      | <i>h- cut11-GFP:ura4 SV40:GFP-atb2:leu1 sid2-Tom:naf</i>                            |
| JJ1792      | <i>h- imp1Δ::ura4 cut11-GFP:ura4 SV40:GFP-atb2:leu1 sid2-Tom:naf</i>                |
| JJ1712      | <i>h- ura4-d18 ade6-210 SV40:GFP-atb2:leu1 sid2-Tom:naf</i>                         |
| JJ1719      | <i>h- imp1Δ::ura4 SV40:GFP-atb2:leu1 sid2-Tom:naf</i>                               |
| JJ1712      | <i>h- ura4-d18 ade6-210 SV40:GFP-atb2:leu1 sid2-Tom:naf</i>                         |
| JJ1719      | <i>h- imp1Δ::ura4 SV40:GFP-atb2:leu1 sid2-Tom:naf</i>                               |
| JJ1738      | <i>h- ura4-d18 leu1-32 imp1-GFP:kan<sup>r</sup> sid2-Tom:naf</i>                    |
| JJ1778      | <i>h- imp1-GFP:kan<sup>r</sup> pREP81-tdTom-atb2</i>                                |
| JJ1945      | <i>h- ura4-d18 leu1-32 ase1-GFP:kan<sup>r</sup> imp1-Tom:naf</i>                    |
| RD1233      | <i>h- ura4-d18 leu1-32 ase1-GFP:kan<sup>r</sup> sid2-Tom:naf</i>                    |
| JJ1779      | <i>h- ase1-GFP:kan<sup>r</sup> imp1Δ::ura4 sid2-Tom:naf</i>                         |
| JJ1889      | <i>h- imp1Δ::ura4 ase1::kan<sup>r</sup> sid2-Tom:naf SV40:GFP-atb2:leu1</i>         |
| JJ1948      | <i>h+ leu1-32 cut15-GFP:kan<sup>r</sup> imp1Δ::ura4 sid2-Tom:naf</i>                |
| JJ1900      | <i>h+ leu1-32 nup107-GFP:ura4 imp1-Tom:naf</i>                                      |
| JJ1912      | <i>h- imp1-Tom:naf nup61-GFP:ura4 ade6-210</i>                                      |
| JJ564       | <i>h- leu1-32 imp1-GFP:kan<sup>r</sup></i>                                          |
| JJ2205      | <i>h- imp1Δ::ura4 sid2-Tom:naf pREP41-GFP-imp1ΔIBB-ED (D192R E393R)</i>             |
| JJ2217      | <i>h- imp1-Tom pREP41-imp1ΔIBB-ED-GFP</i>                                           |
| JJ2218      | <i>h- imp1Δ::ura4 sid2-Tom:naf pREP41-GFP-imp1ΔIBB</i>                              |
| JJ2241      | <i>h90 ade6-216 leu1-32 lys1-131 ura4-D18 kap104::kap104-GFP-HA:kan<sup>r</sup></i> |
| JJ2243      | <i>h90 ade6-216 leu1-32 lys1-131 ura4-D18 sal3::sal3-GFP-HA:kan<sup>r</sup></i>     |
| JJ2156      | <i>h- imp1-GFP:ura4 pim1-d1 sid2-Tom:naf</i>                                        |
| JJ1738      | <i>h- ura4-d18 leu1-32 imp1-GFP:kan<sup>r</sup> sid2-Tom:naf</i>                    |
| JJ1712      | <i>h- ura4-d18 ade6-210 SV40:GFP-atb2:leu1 sid2-Tom:naf</i>                         |
| JJ1992      | <i>h- pim1-d1 SV40:GFP-atb2:leu1 sid2-Tom:naf</i>                                   |
| JJ1712      | <i>h- ura4-d18 ade6-210 SV40:GFP-atb2:leu1 sid2-Tom:naf</i>                         |
| JJ1980      | <i>h- ura4-d18 cdc48-353 SV40:GFP-atb2:leu1 sid2-Tom:naf</i>                        |
| JJ1991      | <i>h- ura4-d18 leu1-32 cdc48-GFP:kan<sup>r</sup></i>                                |
| JJ1983      | <i>h- leu1-32 imp1Δ::ura4 cdc48-GFP:kan<sup>r</sup></i>                             |
| JJ1997      | <i>h- ura4-d18 leu1-32 pREP41-NLS* (LRAAAAP)-cdc48-GFP</i>                          |
| RD1554      | <i>h- ura4-d18 leu1-32 ade6-210 ark1-GFP:kan<sup>r</sup></i>                        |
| JJ1915      | <i>h- leu1-32 ark1-GFP:kan<sup>r</sup> imp1Δ::ura4</i>                              |
| JJ2070      | <i>h- ura4-d18 ade6-210 clp1-GFP:kan<sup>r</sup></i>                                |
| PT432       | <i>h- ura4-d18 leu1-32 ade6-210 klp9-GFP:kan<sup>r</sup></i>                        |
| JJ1806      | <i>h- leu1-32 klp9-GFP:kan<sup>r</sup> imp1Δ::ura4</i>                              |
| AR065       | <i>h- ura4-d18 klp5-GFP:kan<sup>r</sup>pREP1-mRFP-atb2</i>                          |
| RD3013      | <i>h+ int:pREP4x-SV40-NLS-GFP-lacZ:ura4 ade6- leu1-32 ura4-D18</i>                  |
| RD3510      | <i>h+ rpn8-GFP:naf imp1-3xHA:kan<sup>r</sup></i>                                    |
| RD3513      | <i>h+ rpn8-GFP:naf imp1Δ::ura4 leu1-32</i>                                          |
| RD3250      | <i>h+ pim1-GFP:naf ade6-210 ura4-D18 leu1-32</i>                                    |
| JJ2361      | <i>h- pim1-d1 imp1-GFP:kan<sup>r</sup>, naf:pADH-Cherry-atb2 leu1-32</i>            |
| JJ1892      | <i>h- ura4-d18 imp1Δ::ura4 klp5-GFP:kan<sup>r</sup> pREP1-mRFP-atb2</i>             |
| AR085       | <i>h- ura4-d18 klp6-GFP:kan<sup>r</sup>pREP1-mRFP-atb2</i>                          |
| JJ1894      | <i>h- imp1Δ::ura4 klp6-GFP:kan<sup>r</sup> pREP1-mRFP-atb2</i>                      |
| JJ563       | <i>h- imp1-3xHA:kan<sup>r</sup> leu1-32</i>                                         |
